# Supplementary material for: Tumor-associated macrophages subvert T-cell function and correlate with reduced survival in clear cell renal cell carcinoma
Source: PubMed Central journal article supplement — Oncoimmunology. 2013 Mar 1;2(3):e23562. doi: 10.4161/onci.23562 (PMC3655740; doi:10.4161/onci.23562), 2013-03-01
Supplement: onci-2-e23562-s01.pdf [file onci-2-e23562-s01.pdf]

## **Supplemental Material to:**

**Stefanie Dannenmann, Julia Thielicke, Martina Stöckli,  
Claudia Matter, Lotta von Boehmer, Virginia Cecconi,  
Thomas Hermanns, Lukas Hefermehl, Peter Schraml,  
Holger Moch, Alexander Knuth and Maries van den Broek**

**Tumor-associated macrophages subvert T cell function  
and correlate with reduced survival in clear cell renal cell  
carcinoma**

**Oncoimmunology 2013; 2(3)**

**<http://dx.doi.org/10.4161/onci.23562>**

**[http://www.landesbioscience.com/journals/oncoimmunology/  
article/23562/](http://www.landesbioscience.com/journals/oncoimmunology/article/23562/)**

**Supplementary Table S1: Summary of Taq Man Assays used for retrospective screen**

|            | Target       | Gene Symbol   | Taq Man Assay ID |
|------------|--------------|---------------|------------------|
| <b>A</b>   | CD45         | PTPRC         | Hs00236304_m1    |
|            | CD3          | CD3G          | Hs00962186_m1    |
|            | CD4          | CD4           | Hs00181217_m1    |
|            | CD8          | CD8A          | Hs00233520_m1    |
|            | CD68         | CD68          | Hs00154355_m1    |
|            | MHC class-I  | HLA-C         | Hs03044135_m1    |
|            | MHC class-II | HLA-DRA       | Hs00219575_m1    |
|            | CTLA-4       | CTLA4         | Hs00175480_m1    |
|            | FoxP3        | FOXP3         | Hs01085834_m1    |
|            | Tim-3        | HAVCR2        | Hs00262170_m1    |
|            | PD-1         | PDCD1         | Hs00169472_m1    |
|            | PD-L1        | CD274         | Hs00204257_m1    |
|            | BTLA         | BTLA          | Hs00699198_m1    |
|            | HVEM         | TNFRSF14      | Hs00187058_m1    |
|            | CD200        | CD200         | Hs01033303_m1    |
|            | IDO          | IDO1          | Hs00984148_m1    |
|            | Arginase 1   | ARG1          | Hs00968979_m1    |
|            | NKG2D        | KLRK1         | Hs00183683_m1    |
|            | MICA         | MICA          | Hs00741286_m1    |
|            | MICB         | MICB          | Hs00792952_m1    |
|            | IL-10        | IL10          | Hs00961622_m1    |
|            | TGF-b        | TGFB1         | Hs00998133_m1    |
|            | IL-17a       | IL17A         | Hs00174383_m1    |
|            | TNF-a        | TNF           | Hs00174128_m1    |
|            | IFN-g        | IFNG          | Hs00174143_m1    |
|            | IL-2         | IL2           | Hs00174114_m1    |
|            | Perforin     | PRF1          | Hs00169473_m1    |
| Granzyme B | GZMB         | Hs00188051_m1 |                  |
| LT-a       | LTA          | Hs00236874_m1 |                  |
| LT-b       | LTB          | Hs00242739_m1 |                  |
| LT-bR      | LTBR         | Hs00158922_m1 |                  |
| <b>B</b>   | iNOS         | NOS2          | Hs01075529_m1    |
|            | CD163        | CD163         | Hs00174705_m1    |
|            | MR (CD206)   | MRC1;MRC1L1   | Hs00267207_m1    |
|            | FN-1         | FN1           | Hs01549976_m1    |
|            | IRF-4        | IRF4          | Hs01056533_m1    |
|            | IRF-5        | IRF5          | Hs00158114_m1    |
|            | IL-12        | IL12B         | Hs01011518_m1    |
|            | EGF          | EGF           | Hs01099999_m1    |
|            | EGFR         | EGFR          | Hs01076078_m1    |
|            | CSF-1        | CSF1          | Hs00174164_m1    |
|            | CSF-1R       | CSF1R         | Hs00911250_m1    |
|            | Mena         | ENAH          | Hs00403109_m1    |
| <b>C</b>   | IL-4         | IL4           | Hs00174122_m1    |
|            | IL-13        | IL13          | Hs00174379_m1    |
| <b>D</b>   | c-MYC        | MYC           | Hs00905030_m1    |

Taq Man Assays used for initial screen (A), for TAM-related screen (C), and to further characterize sorted CD4+ T cells (C) and myeloid fractions (D)

**Supplementary Table S2: Patients' characteristics of received FFPE material**

|                        |                                 |    |
|------------------------|---------------------------------|----|
| Histology              | clear cell renal cell carcinoma |    |
| Patient number         | n=54                            |    |
| Age (years)            | 40-86 (66.3 ± 7.2)              |    |
| Survival time (months) | 0-213 (80.9 ± 64.2)             |    |
| Pathological Stage     | pT1                             | 2  |
|                        | pT1a                            | 3  |
|                        | pT1b                            | 16 |
|                        | pT2                             | 4  |
|                        | pT3                             | 8  |
|                        | pT3a                            | 6  |
|                        | pT3b                            | 13 |
|                        | pT3c                            | 1  |
|                        | pT4                             | 1  |

Information is only displayed for those patients who died of tumor-related causes

**A****Perforin**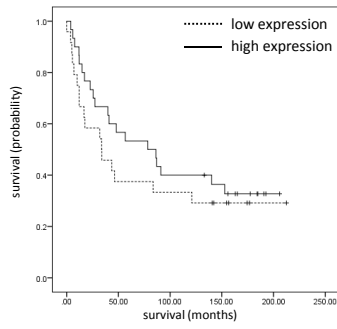

Log-rank test  $p=0.384$   
 Cox regression:  $p=0.009$ , HR=1.550, 95% CI=1.177-2.151

**CD4**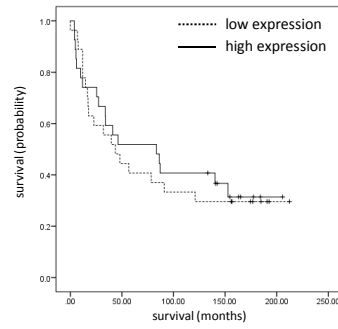

Log-rank test  $p=0.750$   
 Cox regression:  $p=0.979$ , HR=0.933, 95% CI=0.588-1.678

**CD8**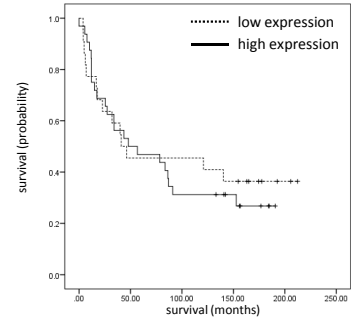

Log-rank test  $p=0.695$   
 Cox regression:  $p=0.998$ , HR=1.000, 95% CI=0.788-1.267

**MHC class-I**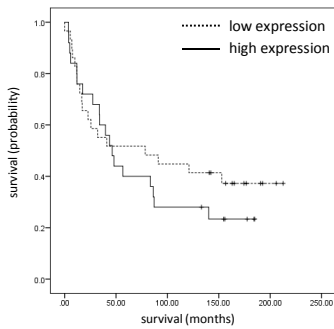

Log-rank test  $p=0.412$   
 Cox regression:  $p=0.276$ , HR=0.885, 95% CI=0.710-1.103

**MHC class-II**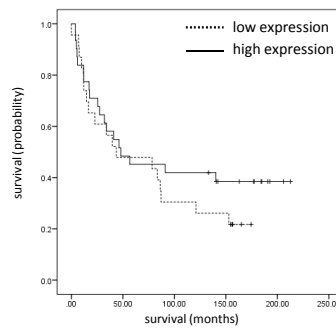

Log-rank test  $p=0.340$   
 Cox regression:  $p=0.478$ , HR=0.899, 95% CI=0.670-1.207

**IDO**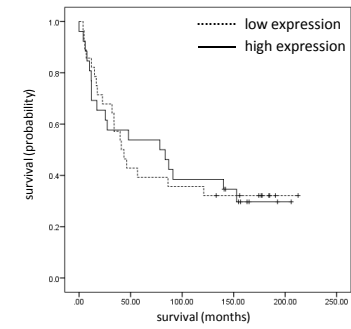

Log-rank test  $p=0.987$   
 Cox regression:  $p=0.409$ , HR=1.077, 95% CI=0.903-1.284

**IFN- $\gamma^*$** 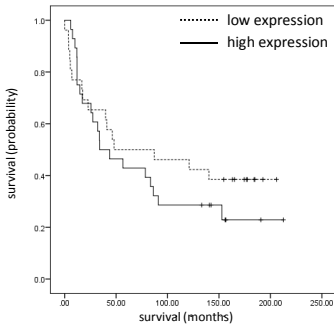

Log-rank test  $p=0.384$   
 Cox regression:  $p=0.745$ , HR=0.973, 95% CI=0.827-1.146

**TNF- $\alpha^*$** 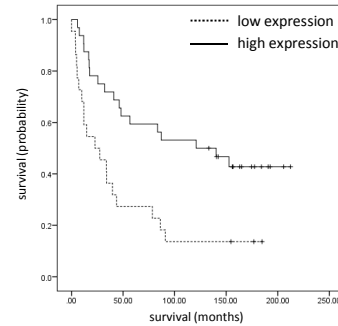

Log-rank test  $p=0.002$   
 Cox regression:  $p=0.626$ , HR=1.035, 95% CI=0.902-1.186

**Granzyme B\***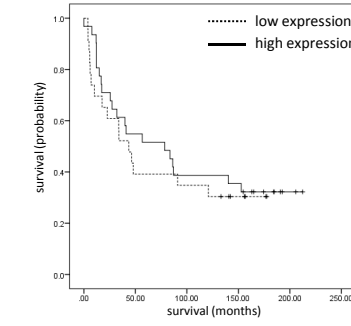

Log-rank test  $p=0.580$   
 Cox regression:  $p=0.983$ , HR=0.998, 95% CI=0.841-1.184

**HVEM**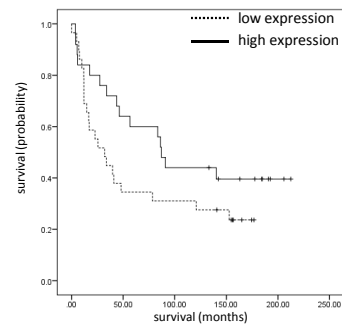

Log-rank test  $p=0.113$   
 Cox regression:  $p=0.076$ , HR=1.380, 95% CI=0.967-1.970

**LT- $\beta$ R**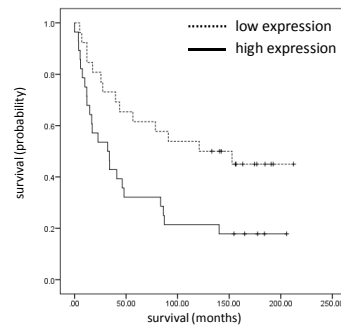

Log-rank test  $p=0.012$   
 Cox regression:  $p=0.795$ , HR=0.963, 95% CI=0.722-1.283

**LT- $\beta^*$** 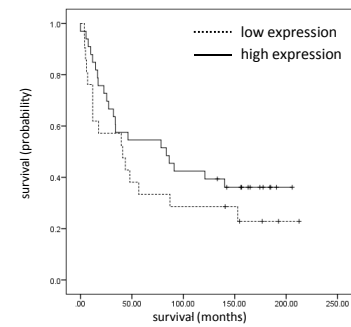

Log-rank test  $p=0.248$   
 Cox regression:  $p=0.324$ , HR=1.129, 95% CI=0.887-1.436

### NKG2D

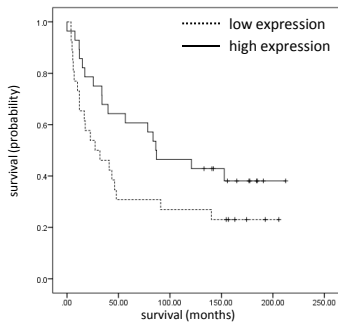

Log-rank test  $p=0.084$   
Cox regression:  $p=0.119$ , HR=1.337, 95% CI=0.928-1.926

### MICA

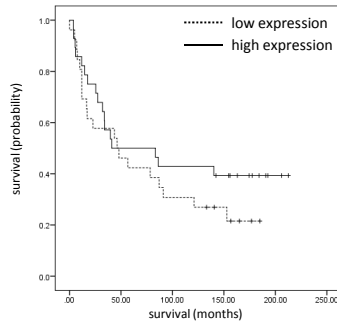

Log-rank test  $p=0.293$   
Cox regression:  $p=0.686$ , HR=0.949, 95% CI=0.737-1.222

### MICB

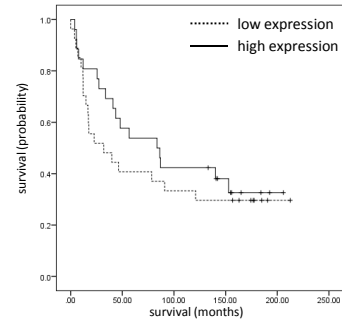

Log-rank test  $p=0.399$   
Cox regression:  $p=0.893$ , HR=1.011, 95% CI=0.858-1.192

### CTLA-4\*

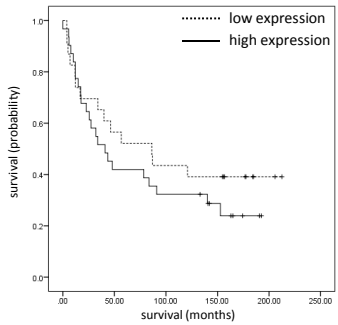

Log-rank test  $p=0.346$   
Cox regression:  $p=0.211$ , HR=0.923, 95% CI=0.814-1.046

### IL-10\*

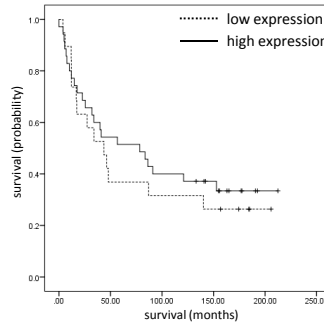

Log-rank test  $p=0.568$   
Cox regression:  $p=0.154$ , HR=0.871, 95% CI=0.721-1.053

### TGF- $\beta$

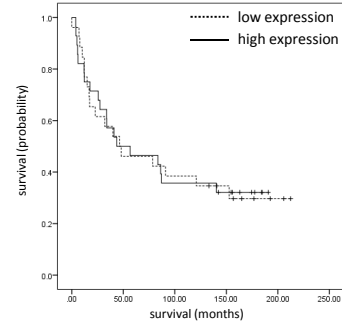

Log-rank test  $p=0.950$   
Cox regression:  $p=0.771$ , HR=1.054, 95% CI=0.740-1.501

### PD-L1

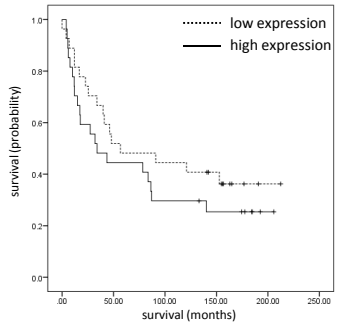

Log-rank test  $p=0.281$   
Cox regression:  $p=0.109$ , HR=0.820, 95% CI=0.644-1.045

### PD-1\*

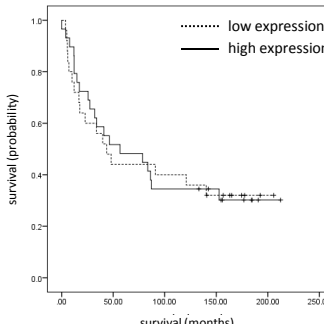

Log-rank test  $p=0.913$   
Cox regression:  $p=0.504$ , HR=0.952, 95% CI=0.826-1.099

### Tim-3\*

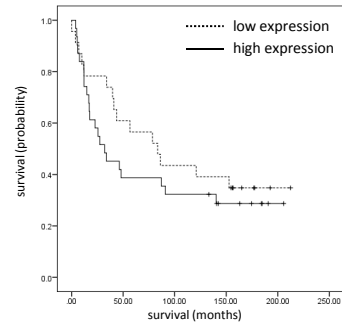

Log-rank test  $p=0.377$   
Cox regression:  $p=0.513$ , HR=0.947, 95% CI=0.806-1.114

### CD200

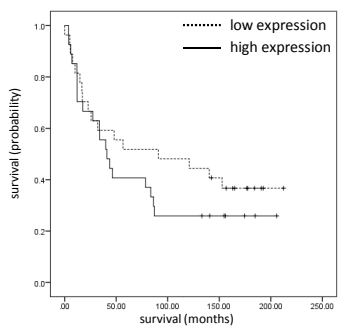

Log-rank test  $p=0.330$   
Cox regression:  $p=0.713$ , HR=0.968, 95% CI=0.815-1.150

## B CTLA-4

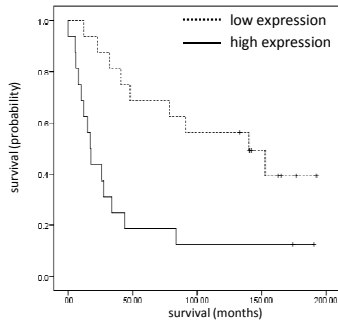

Log-rank test  $p=0.003$   
Cox regression:  $p=0.008$ , HR=0.556, 95% CI=0.361-0.856

## IL-10

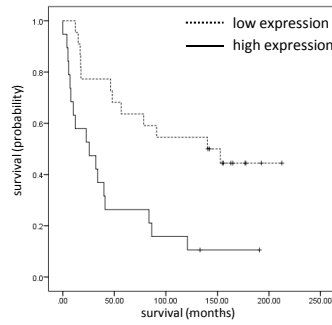

Log-rank test  $p=0.001$   
Cox regression:  $p=0.009$ , HR=0.588, 95% CI=0.396-0.874

## C

### MR

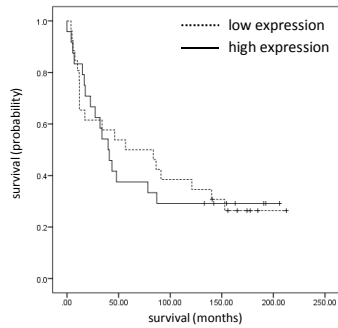

Log-rank test  $p=0.878$   
Cox regression:  $p=0.364$ , HR=1.109, 95% CI=0.887-1.387

### EGF

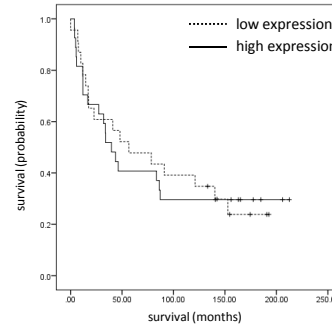

Log-rank test  $p=0.884$   
Cox regression:  $p=0.688$ , HR=1.027, 95% CI=0.902-1.169

### Mena

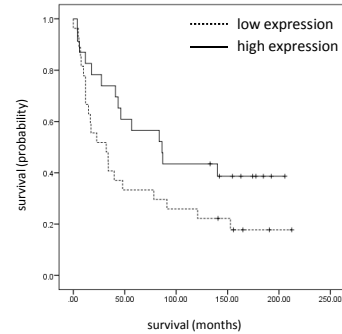

Log-rank test  $p=0.459$   
Cox regression:  $p=0.071$ , HR=0.771, 95% CI=0.581-1.023

### CSF-1

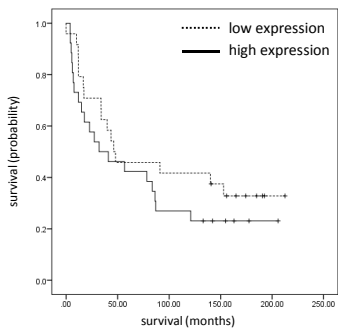

Log-rank test  $p=0.283$   
Cox regression:  $p=0.432$ , HR=0.860, 95% CI=0.590-1.253

### CSF-1R

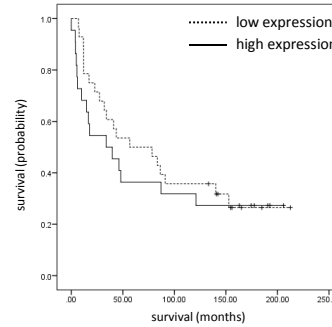

Log-rank test  $p=0.505$   
Cox regression:  $p=0.317$ , HR=0.816, 95% CI=0.549-1.215

### EGF-R

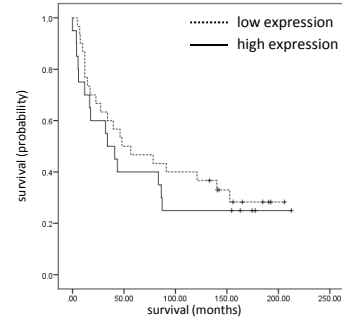

Log-rank test  $p=0.070$   
Cox regression:  $p=0.219$ , HR=1.18, 95% CI=0.906-1.536

### IRF-5

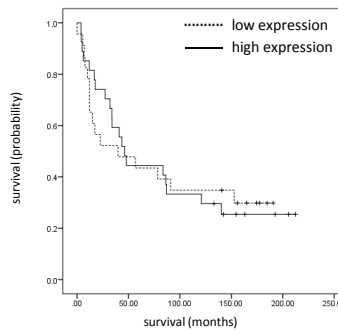

Log-rank test  $p=0.989$   
Cox regression:  $p=0.542$ , HR=0.882, 95% CI=0.588-1.322

### IL-12\*

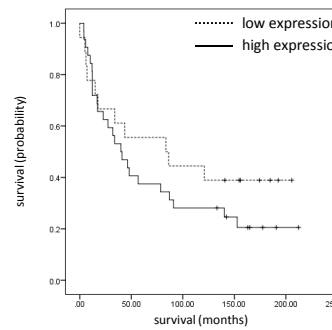

Log-rank test  $p=0.285$   
Cox regression:  $p=0.395$ , HR=0.959, 95% CI=0.872-1.056

**Supplementary Figure S1: Immune profile of ccRCC correlates with survival**

54 ccRCC paraffin-embedded tumor samples were subjected to a retrospective qRT-PCR analysis for 43 different immune response-related genes.  $\Delta\text{Ct}$  levels of CD45 (A) were calculated by normalization to the endogenous control (18s rRNA),  $\Delta\text{Ct}$  levels of all other genes were calculated by normalization to CD45. Transcripts were quantified using original cDNA (A, B) or preamplified cDNA (C). Survival analysis was performed using the Cox proportional hazard model and, after dichotomizing the data based on the mean-expression level, also with the log-rank test of the Kaplan-Meier estimator. Kaplan-Meier curves are shown to represent the relation of the expression of the different target genes with survival and the results of both statistical tests are displayed underneath the plot. Patients that were still alive at time of analysis are marked with a tick. Some genes (marked with an asterisk) were only detected in very low amounts, and in some samples no signal was observed for those genes. Survival analysis was therefore performed once including the no-signal samples by giving an estimated value ( $\text{Ct}=40$ ), and once after excluding the no signal samples from the analysis. The results with or without the no-signal samples were similar for all genes except for IL-10 and CTLA-4. Plots calculated after inclusion of all samples are displayed (A, C), and for CTLA-4 and IL-10 also after exclusion of the no-signal samples (B). Expression of Arginase-1, IL-2, LT- $\alpha$ , BTLA and IL-17 was not detected in the majority of samples and therefore not considered for survival analysis.

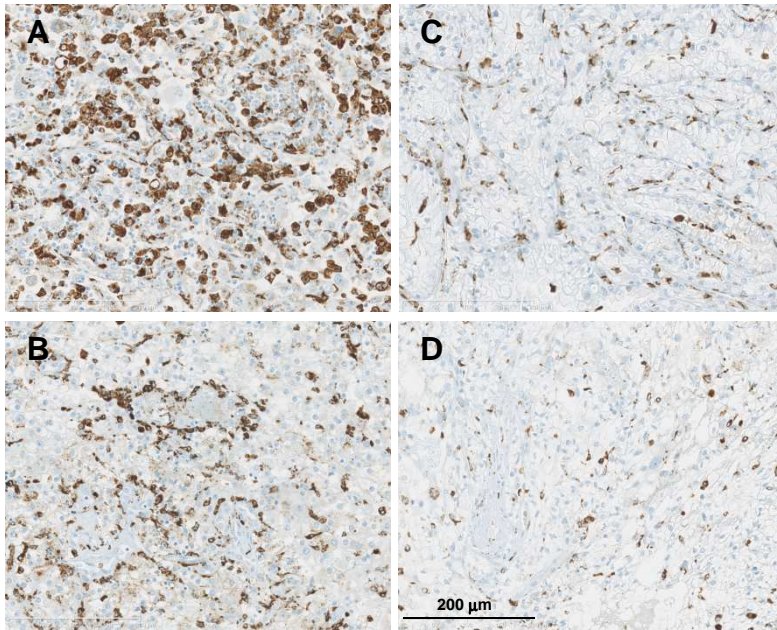

**Supplementary Figure S2: Correlation between CD68 expression measured by qRT-PCR and by immunohistochemistry**

Tumor sections of selected patients were stained for CD68 by immunohistochemistry (brown staining). Scans of microscopy slides at a magnification of 20x are shown. qRT-PCR analysis of the corresponding paraffin punches normalized to the endogenous control 18s rRNA revealed following  $\Delta$ Ct values (A): 14.07, (B): 14.19, (C): 15.63, (D): 18.47.



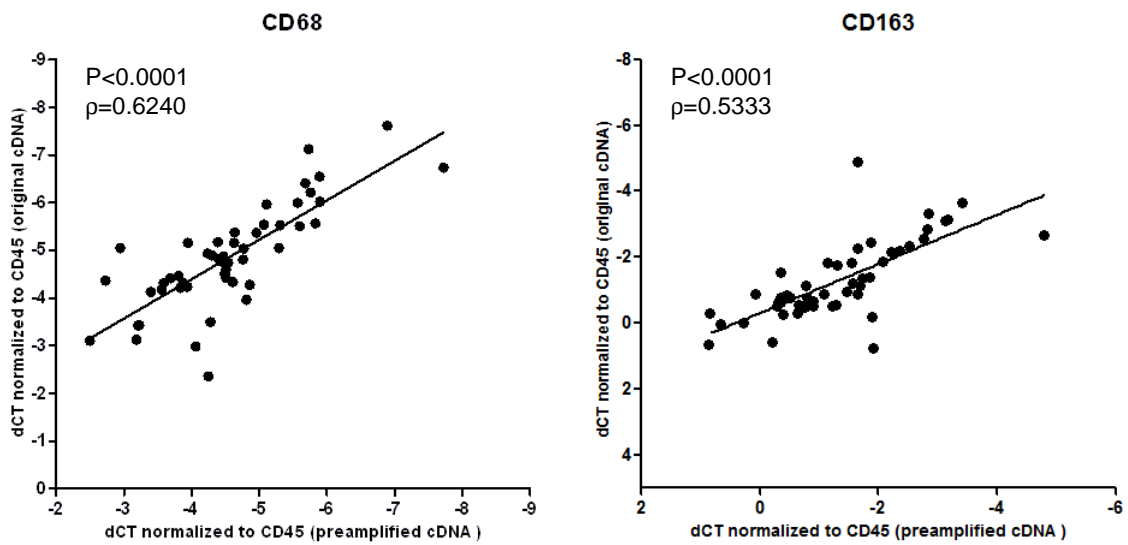

**Supplementary Figure S3:  $\Delta$ CT levels of original cDNA correlate with  $\Delta$ CT levels of preamplified cDNA**

cDNA of paraffin-embedded tumor material was preamplified to enable the evaluation of additional genes. The  $\Delta$ Ct levels of the original cDNA were plotted against the  $\Delta$ CT levels of the preamplified cDNA for CD68 and CD163.  $\Delta$ Ct was calculated by normalizing Ct values to the Ct values of CD45. Each symbol represents an individual sample. Result of Spearman Rho correlation test is displayed in the graph.

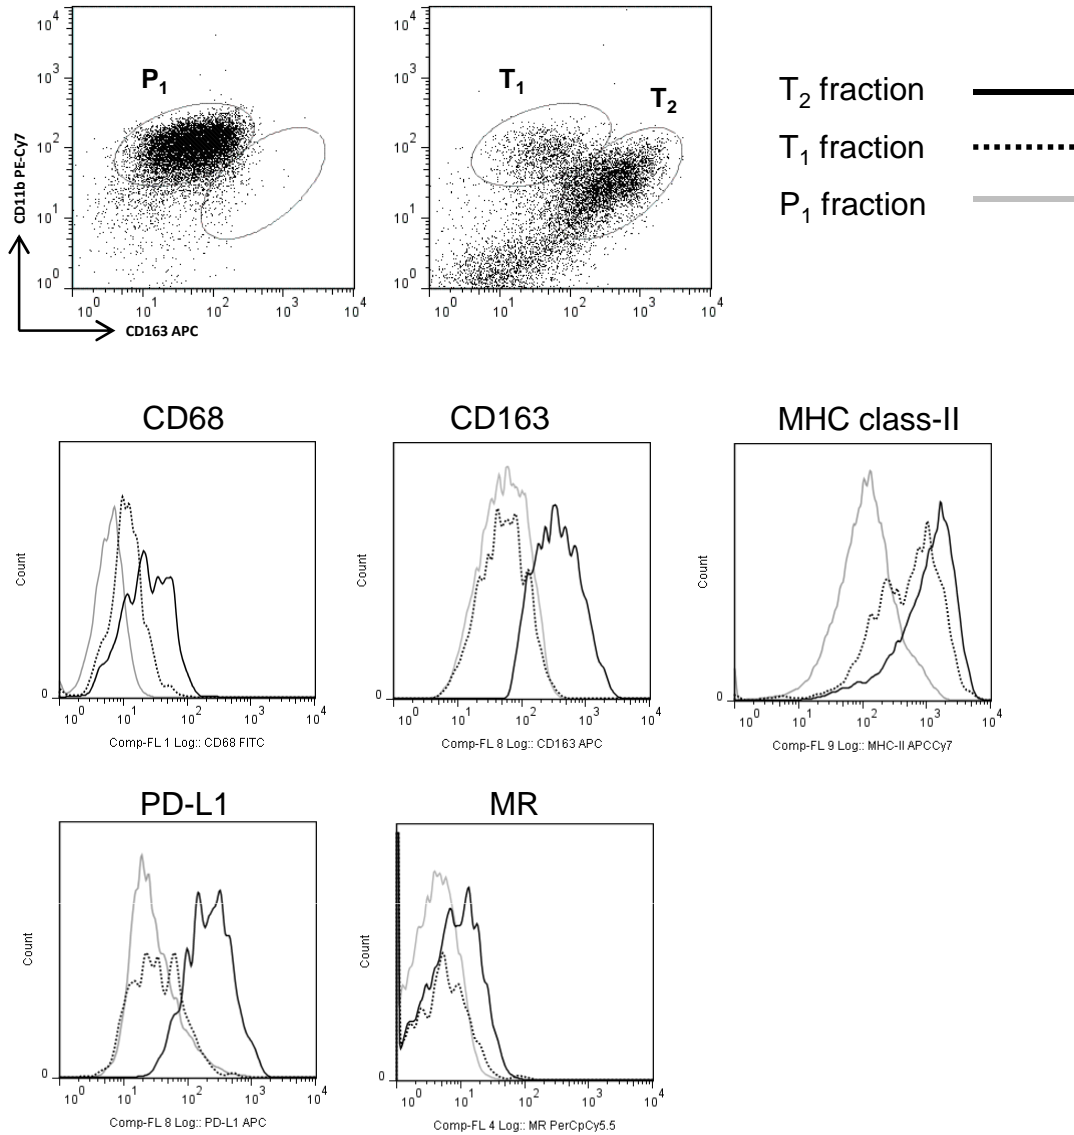

**Supplementary Fig. S4: Representative staining for regulatory molecules on T<sub>1</sub>, T<sub>2</sub> and P<sub>1</sub> myeloid populations**

PBMCs and paired TILs were stained and T<sub>1</sub>, T<sub>2</sub> and P<sub>1</sub> subpopulations were determined after gating on live CD45<sup>+</sup>CD3<sup>+</sup>CD19<sup>-</sup> cells. Representative dot plots of PBMCs (left) and TILs (right) are shown and histograms of the expression of CD68 (intra-cellular), CD163, PD-L1, MR and MHC class-II after gating on T<sub>1</sub>, T<sub>2</sub> and P<sub>1</sub>.

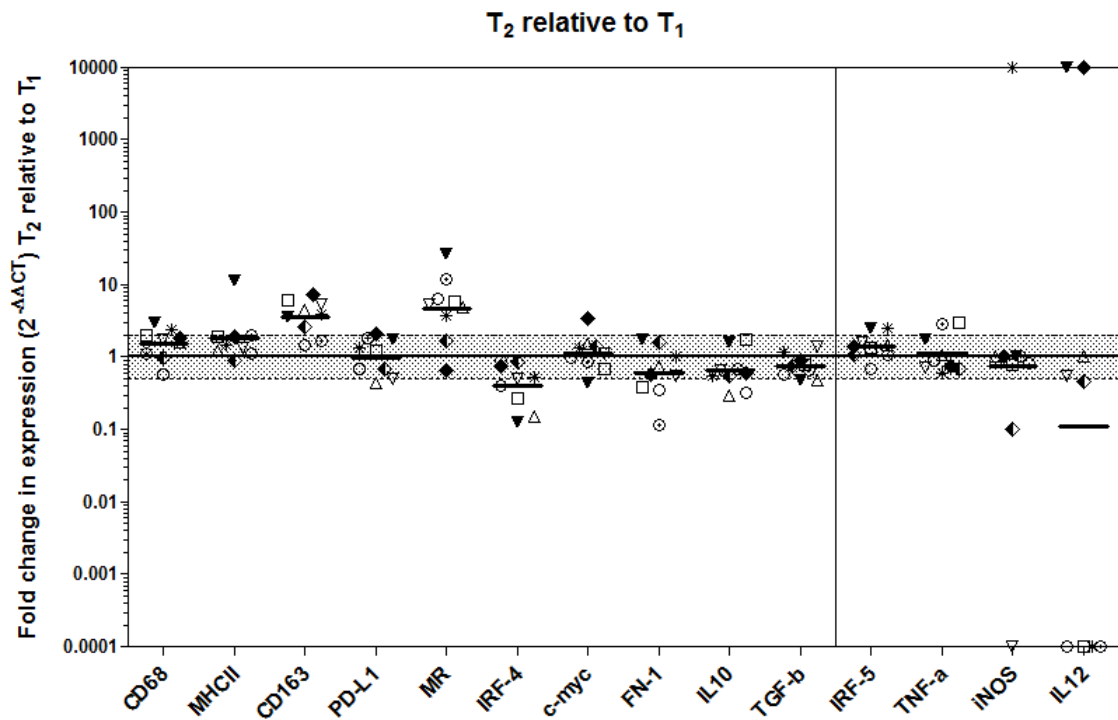

**Supplementary Figure S5: Comparison of T<sub>2</sub> and T<sub>1</sub> fraction via qRT-PCR analysis**

qRT-PCR analysis of FACS-sorted T<sub>2</sub> and T<sub>1</sub> fractions. Genes displayed on the left side of the vertical line are related to M2 TAMs, on the right side to M1 TAMs.  $\Delta Ct$  levels were calculated by normalizing the Ct values of the target genes to the Ct values of PPIA. Results are presented as fold change in expression level of T<sub>2</sub> relative to T<sub>1</sub>. Fold differences in expression within the shaded area are considered as not significant. Symbols at the 10000 or 0.0001 line on the y-axis represent samples of which the fold change could not be calculated, since expression was only detected in one of the fractions. Each symbol represents an individual patient.

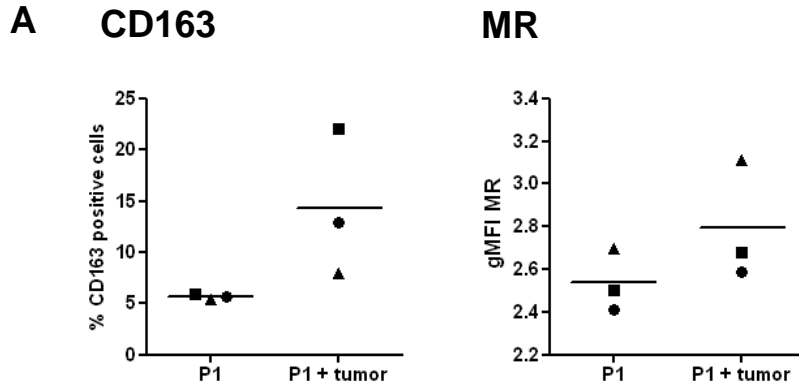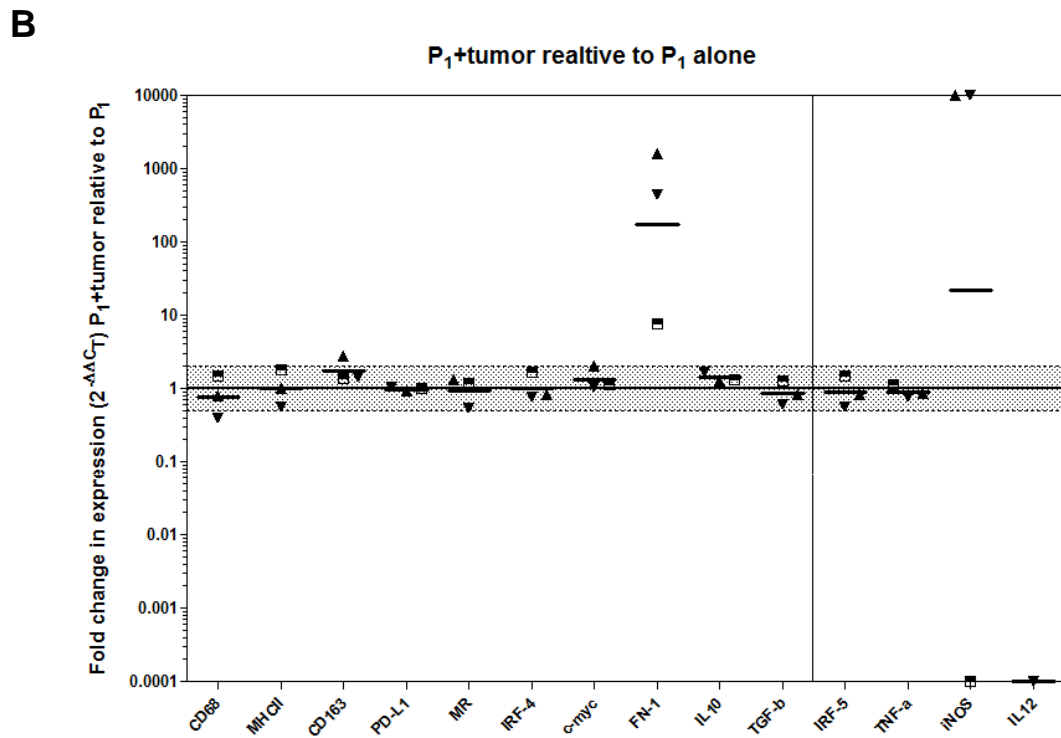

**Supplementary Figure S6: Tumor cells promote transition of an M1 to an M2 phenotype**

FACS-sorted blood-derived CD11b<sup>+</sup> cells were cultured with and without sorted autologous CD45<sup>-</sup> tumor cells for 48 h at a 1:3 ratio. (A) Results of FACS staining for different macrophage-associated markers after gating on CD45<sup>+</sup> CD11b<sup>+</sup> cells. (B) qRT-PCR for different M1- and M2-associated genes after preamplification of the cDNA. Genes displayed on the left side of the vertical line are related to M2 TAMs, on the right side to M1 TAMs.  $\Delta$ Ct levels were calculated by normalizing the Ct values of the target genes to the Ct values of CD45. Results are presented as fold change in expression level of CD11b<sup>+</sup> cells cocultured with CD45<sup>-</sup> tumor cells (P<sub>1</sub>+tumor) relative to CD11b<sup>+</sup> cells cultured without (P<sub>1</sub> alone). Fold differences in expression within the shaded area are considered as not significant. Symbols at the 10000 or 0.0001 line on the y-axis represent samples of which the fold change could not be calculated, since expression was only detected in one of the fractions. Each symbol represents an individual patient. Geometric means of each group are depicted.

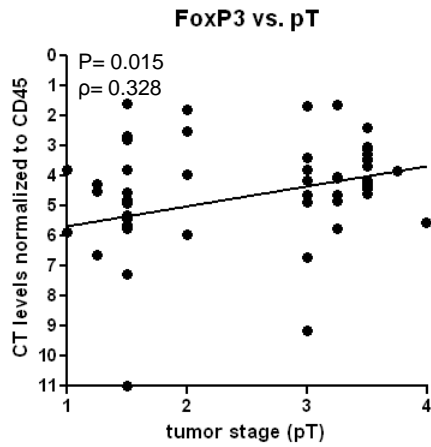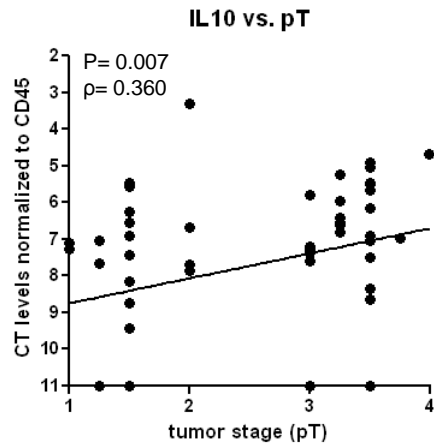

**Supplementary Figure S7: Positive correlation of FoxP3 and IL-10 with tumor progression**  
 qRT-PCR was performed on cDNA of FFPE material from ccRCC tumors and gene expression was correlated with tumor stage (pT). Results of Spearman Rho correlation analysis are shown for FoxP3 and IL-10. Each symbol represents an individual patient.  $\Delta$ Ct levels were calculated by normalizing the Ct values of the target genes to the Ct values of CD45. pT was defined as 1= pT1, 1.25= pT1a, 1.5= pT1b, 2= pT2, 3= pT3, 3.25= pT3a, 3.5= pT3b, 3.75= pT3c and 4= pT4.

**Supplementary Table S3: Patients' characteristics of fresh tumor material**

|                    |                                 |   |
|--------------------|---------------------------------|---|
| Histology          | clear cell renal cell carcinoma |   |
| Patient number     | n=20                            |   |
| Age (years)        | 37-84 (60.5 ± 11)               |   |
| Pathological Stage | pT1                             | 0 |
|                    | pT1a                            | 9 |
|                    | pT1b                            | 3 |
|                    | pT2                             | 3 |
|                    | pT3                             | 0 |
|                    | pT3a                            | 3 |
|                    | pT3b                            | 2 |
|                    | pT3c                            | 0 |
|                    | pT4                             | 0 |

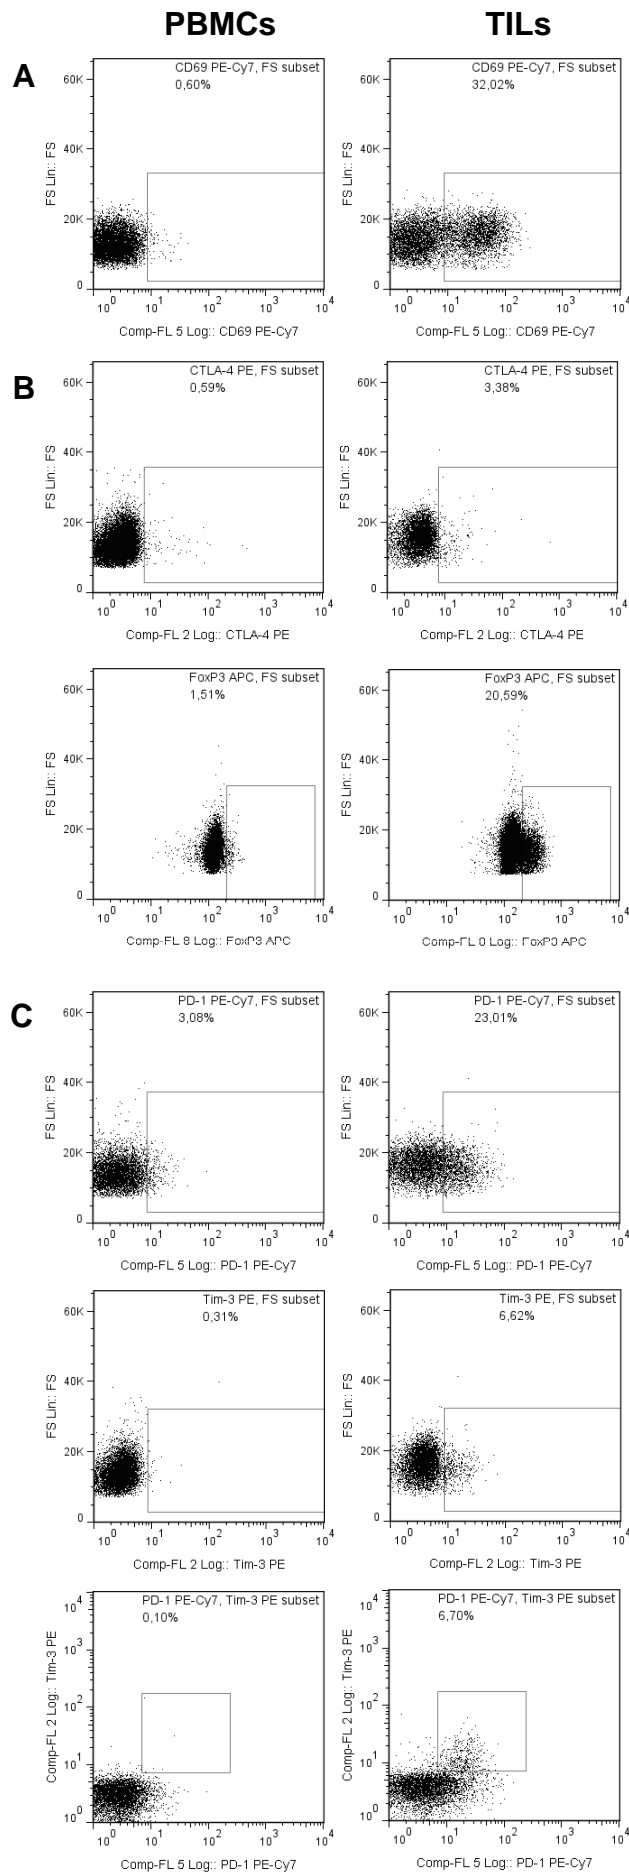

**Supplementary Figure S8:  
Representative staining of co-inhibitory  
molecules on blood- and tumor-derived  
T cells**

PBMCs and autologous TILs were stained with fluorochrome-labeled antibodies for specific surface markers and their expression is depicted after gating on (A) live CD45<sup>+</sup> CD3<sup>+</sup> cells, on (B) live CD45<sup>+</sup> CD4<sup>+</sup> cells or on (C) live CD45<sup>+</sup> CD8<sup>+</sup> cells.

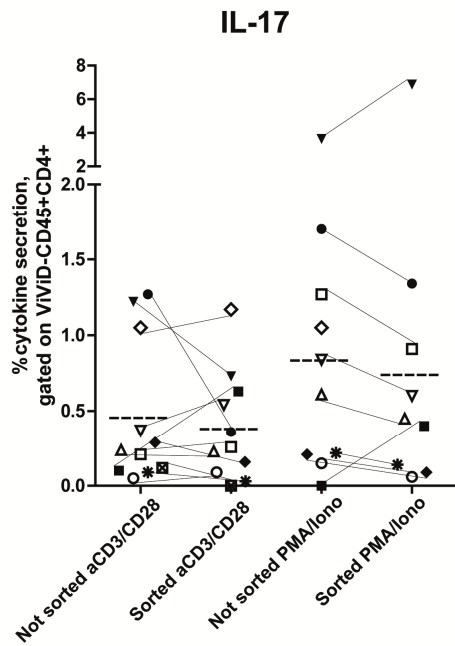

**Supplementary Figure S9: The tumor microenvironment does not impact on the capacity of CD4<sup>+</sup> T cells to produce IL-17**

Intracellular staining for IL-17 after 6h *ex vivo* stimulation with anti-CD3/CD28 beads or with PMA + ionomycin in the presence of brefeldin A and monensin. Cells were stimulated within the tumor digest or after sorting of CD45<sup>+</sup> CD4<sup>+</sup> T cells and were analyzed after gating on live CD45<sup>+</sup> CD4<sup>+</sup> T cells. Each symbol represents an individual patient; results of unsorted and sorted T cells from the same patient are connected by a thin line, the mean of each group is depicted.



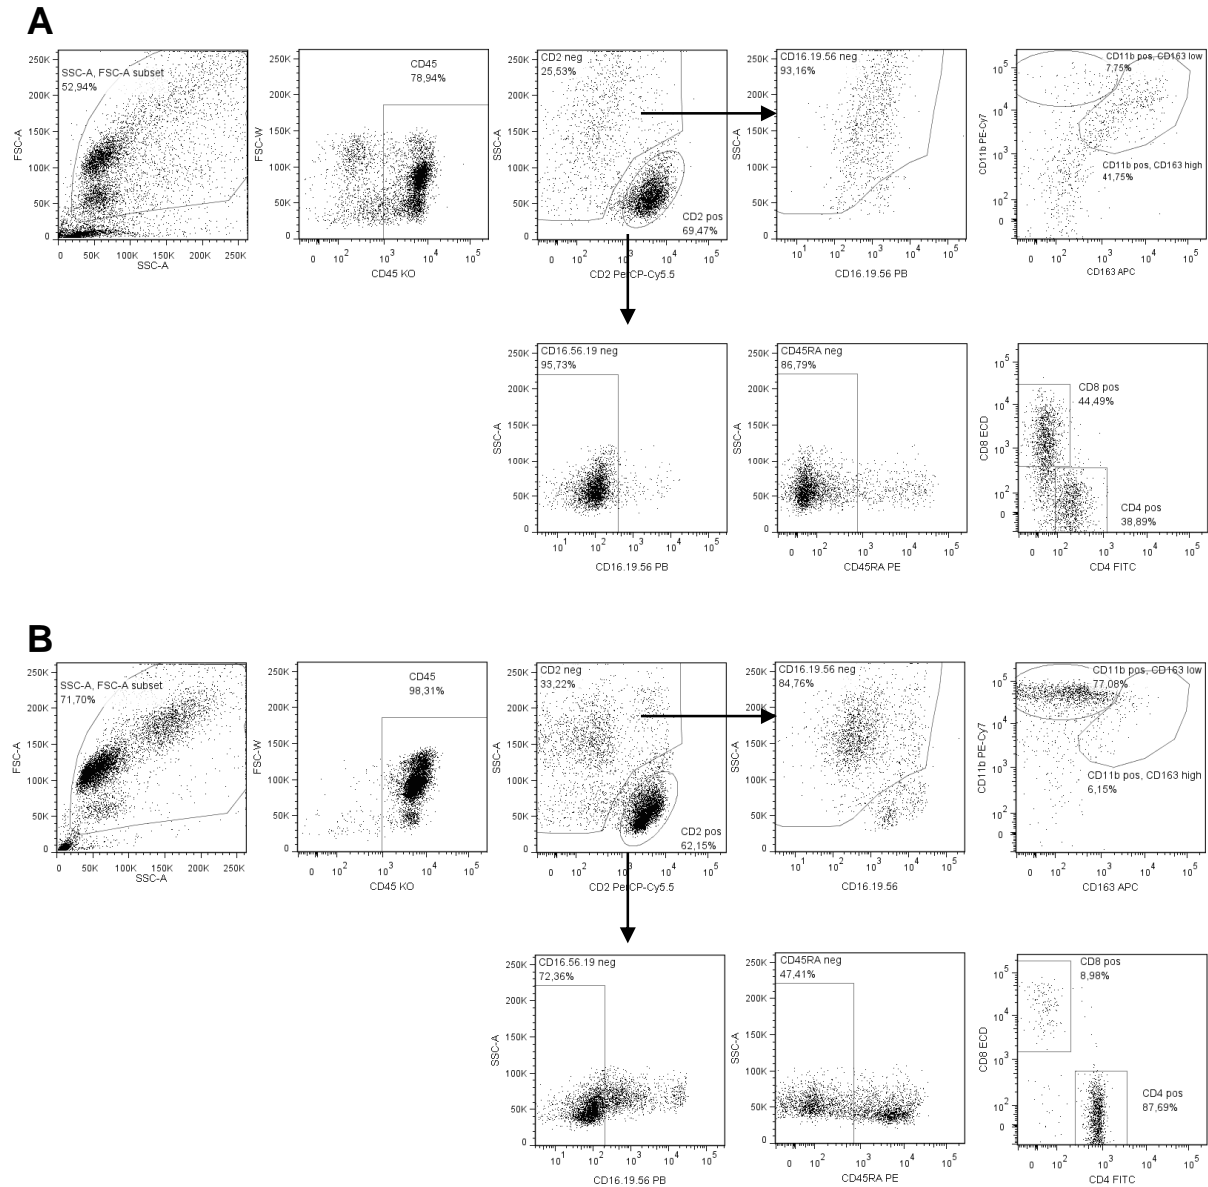

**Supplementary Figure S10: Sorting strategy for myeloid and T cells from fresh ccRCC biopsies and blood**

Sorting strategy for the simultaneous isolation of myeloid cells and T cells from (A) digested ccRCC tumors and (B) autologous PBMCs. After exclusion of cell debris, gates were set on CD45<sup>+</sup> cells. For the sorting of T cells gates were set on CD2<sup>+</sup> cells, CD16<sup>-</sup> CD19<sup>-</sup> and CD56<sup>-</sup> cells, followed by gating on CD45RA<sup>-</sup> cells and finally on either the CD4<sup>+</sup> or CD8<sup>+</sup> population. For the isolation of myeloid cells gates were set on CD2<sup>-</sup> cells, then on CD16<sup>-</sup> CD19<sup>-</sup> and CD56<sup>-</sup> cells, and finally on the CD11b<sup>+</sup> CD163<sup>low</sup> population (P<sub>1</sub> and T<sub>1</sub> fraction) or on the CD11b<sup>+</sup>CD163<sup>high</sup> population (T<sub>2</sub> fraction).

## **SUPPLEMENTARY MATERIALS AND METHODS**

### **Flow Cytometry for phenotypical analysis**

Cells were stained with combinations of following fluorochrome-conjugated antibodies CD4 FITC, Tim-3 PE, CTLA-4 PE, CD8 ECD, CD3 PerCP, PD-1 PE-Cy7, CD69 PE-Cy7, CD45RA PacificBlue, CD45 KromeOrange, FoxP3 APC, CD45RA APC, CD25 APC-Cy7, CD68 FITC, PD-L1 PE, CD14 ECD, MR PerCPCy5.5, CD11b PE-Cy7, CD3 PacificBlue, CD19 PacificBlue, CD45 KromeOrange, CD163 APC or PD-L1 APC, HLA-DR APC-Cy7.

### **FACS sorting of T cells and TAMs from TILs and PBMCs**

(i) Sorting of T cells only: processed tumors or PBMC

Surface staining mix: CD45 PerCP-Cy5.5, CD8 ECD and CD4 KromeOrange.

(ii) Sorting of T cells plus TAMs: processed tumors or PBMC

Surface staining mix: CD45 KromeOrange, CD19, CD16, CD56 PacificBlue, CD8 ECD, CD4 FITC, CD11b PE-Cy7, CD163 APC, CD2 PerCP-Cy5.5, and CD45RA PE or PacificBlue.

### **Polyclonal stimulation and intracellular cytokine staining (ICS)**

(i) Stimulation of T cells in presence or absence of tumor microenvironment

Surface staining mix: CD45 PerCP-Cy5.5, CD8 ECD, CD4 KromeOrange, CD14, CD16, CD19 PacificBlue; intracellular staining mix: IFN- $\gamma$  FITC, IL-17 PE, IL-2 PE-Cy7, IL10 APC.

(ii) Stimulation of T cells in presence or absence of TAMs

Surface staining mix: CD45KromeOrange, CD4 FITC, CD11b PacificBlue with (A) or without TGF- $\beta$ 1 PE (B); intracellular staining mix: (A) IL-4 PE-Cy7, IL-2 PerCP-Cy5.5, IL-10 APC, (B) IL17 PE, IFN- $\gamma$  PE-Cy7, IL-13 APC, TNF- $\alpha$  PerCPCy5.5.

### **RNA isolation from paraffin material**

Deparaffinization of the paraffin punches was performed in 300  $\mu$ L elution buffer (1 M Tris pH 8, 0.5 M EDTA pH 8, 20% SDS (all Ambion), ultrapure water (Sigma)) for 10 min at 95°C while shaking. Samples were subsequently centrifuged (Eppendorf centrifuge 5417R, Omnilab) for 10 min at 14'000 rpm and 4°C

and digested with 3  $\mu$ L of Proteinase K (18 +/- 4 mg/ml, Roche) for 72 hours at 55°C. Thereafter samples were centrifuged for 2 min at 14'000 rpm and 4°C and 250  $\mu$ L of the obtained supernatants were transferred into new tubes. 750  $\mu$ L TRIzol LS Reagent (Invitrogen) was added to each sample and tubes were mixed by vortexing. Samples were homogenized by centrifugation for 2 min at 14'000 rpm and 4°C using QIA-shredder columns. RNA purification was performed by phenol and chloroform extractions: 200  $\mu$ L of chloroform was added to each flow-through, then samples were mixed by inverting the tubes, incubated at room temperature for 5 min until two phases were visible and centrifuged for 15 min at 14'000 rpm and 4°C. The upper aqueous phase containing the RNA was transferred into a new tube, 20  $\mu$ g glycogen (Invitrogen) was added and the RNA precipitated by adding 0.5 mL isopropanol (99.9% V/V, Kantonsapotheke Zürich). Samples were subsequently incubated for 15 min at room temperature and centrifuged for 20 min at 14'000rpm and 4°C. After removing the supernatant the pellet was washed with 1 mL 75% ethanol (absolute for analysis, Merck), air-dried, dissolved in RNase free water (Sigma) and digested with 80 U/ml DNase I (New England Biolabs) for 15 min at room temperature followed by an inactivation by 2 mM EDTA (Ambion) for 10 min at 65°C.
